# Supplementary material for: Dietary intake of walnut prevented Helicobacter pylori-associated gastric cancer through rejuvenation of chronic atrophic gastritis
Source: PubMed Central journal article supplement — J Clin Biochem Nutr. 2020 Oct 13;68(1):37–50. doi: 10.3164/jcbn.20-103 (PMC7844657; doi:10.3164/jcbn.20-103), 2020-10-13
Supplement: jcbn20-103sf01.pdf [file jcbn20-103sf01.pdf]

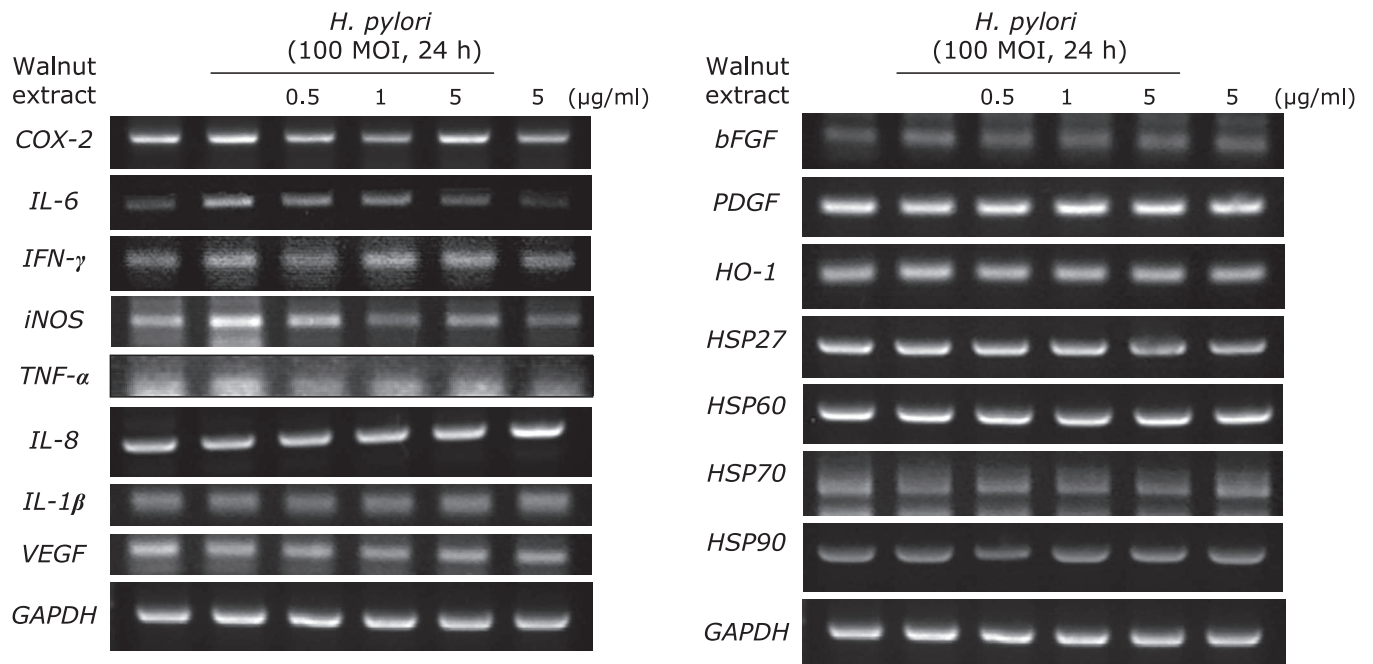

**Supplemental Fig. 1.** RT-PCR for inflammatory, angiogenic, and chaperone genes after *H. pylori* infection (100 MOI, 24 h) and their changes with WPE cotreatment (0.5, 1, and 5 μg/ml).
